# Supplementary material for: Tonsillectomy among children with low baseline acute throat infection consultation rates in UK general practices: a cohort study
Source: HighWire-hosted journal article supplement (doi:10.1136/bmjopen-2014-006686), 2015-02-01
Supplement: bmjopen-2014-006686supp2.pdf [file bmjopen-2014-006686supp2.pdf]

## S2 – Read codes

### Sore throat

|                                  |       |
|----------------------------------|-------|
| Acute tonsillitis                | H03   |
| Acute erythematous tonsillitis   | H030. |
| Acute follicular tonsillitis     | H031. |
| Acute ulcerative tonsillitis     | H032. |
| Acute catarrhal tonsillitis      | H033. |
| Acute gangrenous tonsillitis     | H034. |
| Acute bacterial tonsillitis      | H035. |
| Acute viral tonsillitis          | H036. |
| Acute tonsillitis NOS            | H03z  |
| streptococcal tonsillitis        | A3403 |
| Acute staphylococcal tonsillitis | H0351 |
| Acute pneumococcal tonsillitis   | H0350 |
| O/E - exudate on tonsils         | 2DB7. |
| Acute pharyngitis                | H02.  |
| Acute gangrenous pharyngitis     | H020. |
| Acute ulcerative pharyngitis     | H022. |
| Acute bacterial pharyngitis      | H023. |
| Acute viral pharyngitis          | H024. |
| Acute staphylococcal pharyngitis | H0231 |
| Acute pharyngitis NOS            | H02z  |
| Acute bacterial pharyngitis NOS  | H023z |
| Streptococcal pharyngitis        | A3402 |
| Acute pneumococcal pharyngitis   | H0230 |
| Acute phlegmonous pharyngitis    | H021. |
| Acute nasopharyngitis            | H00   |

|                               |       |
|-------------------------------|-------|
| Streptococcal sore throat     | A340. |
| Has a sore throat             | 1C92. |
| Persistent sore throat        | 1C93. |
| Sore throat symptom NOS       | 1C9Z. |
| Streptococcal sore throat NOS | A340z |
| throat pain                   | 1CB3. |
| [D]Throat pain                | R041. |
| Throat soreness               | 1C9.. |
| Has a sore throat             | 1C92. |

#### **Upper respiratory tract infections**

|         |                                             |
|---------|---------------------------------------------|
| H1z..00 | Upper respiratory tract disease NOS         |
| H051.00 | Acute upper respiratory tract infection     |
| H05z.11 | Upper respiratory tract infection NOS       |
| H05..00 | Other acute upper respiratory infections    |
| H05z.12 | Viral upper respiratory tract infection NOS |
| H05z.00 | Upper respiratory infection NOS             |
